# Supplementary material
Source: PubMed Central journal article supplement (PMC5774864)
Supplement: NIHMS933465-supplement-supplement_1.pdf [file NIHMS933465-supplement-supplement_1.pdf]

Table S1. Correlation matrix with means and SDs for 14 cytokines used to create the inflammatory index

|                                      | 1      | 2      | 3      | 4      | 5      | 6      | 7      | 8      | 9      | 10     | 11     | 12     | 13    | 14    |
|--------------------------------------|--------|--------|--------|--------|--------|--------|--------|--------|--------|--------|--------|--------|-------|-------|
| 1. IL-1 $\beta$ (Interleukin 1 beta) | —      |        |        |        |        |        |        |        |        |        |        |        |       |       |
| 2. IL-4 (Interleukin 4)              | .301** | —      |        |        |        |        |        |        |        |        |        |        |       |       |
| 3. IL-5 (Interleukin 5)              | -.096† | .081   | —      |        |        |        |        |        |        |        |        |        |       |       |
| 4. IL-6 (Interleukin 6)              | .113*  | .073   | .106*  | —      |        |        |        |        |        |        |        |        |       |       |
| 5. IL-7 (Interleukin 7)              | .045   | .004   | .065   | .136** | —      |        |        |        |        |        |        |        |       |       |
| 6. IL-8 (Interleukin 8)              | .043   | .026   | -.006  | .089†  | .184** | —      |        |        |        |        |        |        |       |       |
| 7. IL-10 (Interleukin 10)            | .070   | .061   | .266** | .228** | .073   | .064   | —      |        |        |        |        |        |       |       |
| 8. IL-12 (Interleukin 12)            | .196** | .163** | .101*  | .422** | .196** | .125*  | .460** | —      |        |        |        |        |       |       |
| 9. IL-13 (Interleukin 13)            | .355** | .170** | .084†  | .223** | .214** | .008   | .310** | .456** | —      |        |        |        |       |       |
| 10. IL-17 (Interleukin 17)           | .143** | .240** | .099*  | .192** | .125*  | .148** | .224** | .494** | .349** | —      |        |        |       |       |
| 11. G-CSF                            | .078   | .161** | .198** | .185** | .200** | .148** | .146** | .320** | .285** | .462** | —      |        |       |       |
| 12. IFN- $\gamma$ (Interferon gamma) | .277** | .182** | .060   | .296** | .141** | .053   | .078   | .212** | .263** | .078   | .185** | —      |       |       |
| 13. MIP-1 $\beta$                    | .064   | .005   | .064   | .057   | .092†  | .233** | .174** | .103*  | .110*  | .111*  | .140** | .002   | —     |       |
| 14. TNF- $\alpha$                    | .200** | .141** | .093†  | .294** | .118*  | -.001  | .401** | .348** | .317** | .276** | .227** | .298** | .001  | —     |
| Mean                                 | 1.525  | 1.090  | 1.245  | 1.213  | 1.990  | 2.136  | 2.017  | 1.354  | 1.656  | 1.162  | 1.380  | 1.102  | 2.235 | 1.823 |
| SD                                   | .677   | .340   | .527   | .501   | .638   | .550   | .629   | .608   | .702   | .446   | .618   | .361   | .452  | .686  |

\*\* $p \leq .01$ ; \* $p \leq .05$ ; † $p < .10$  (two-tailed tests);  $N = 413$ . G-CSF: Granulocyte-colony stimulating factor; MIP-1 $\beta$ : Macrophage inflammatory protein 1 beta; TNF- $\alpha$ : Tumor necrosis factor alpha

Figure S2: Effect of the Parent-child relationship through Romantic Partner Support Alone

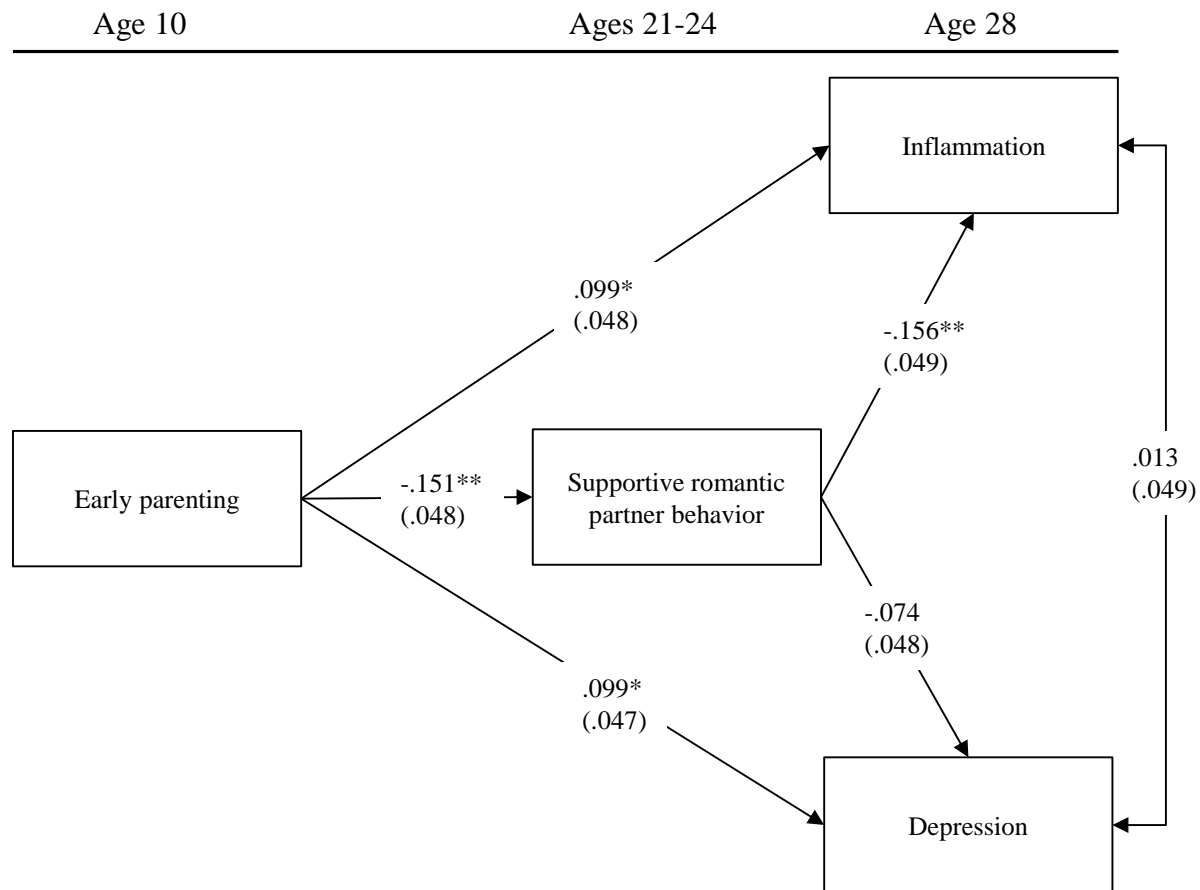

Chi-square = .000,  $df = 0$ ,  $p = .000$ ; CFI = 1.000. Values are standardized parameter estimates and standard errors are in parentheses. Gender, insurance, diet, exercise, binge drinking, cigarette use, high school, and married or cohabited are controlled in these analyses.  $N = 413$ .

Using bootstrap methods with 1,000 replications, the test of the indirect effect of early parenting on INF through supportive romantic partner relationship is significant [indirect effect = .024, 95% CI (.006, .059), 19.512% of the total variance],  $p < .05$ ].

Using bootstrap methods with 1,000 replications, the test of the indirect effect of parent-child relationship on depression through supportive romantic partner relationship is not significant [indirect effect = .011, 95% CI (-.004, .030)].

\*\* $p \leq .01$ ; \* $p \leq .05$ ; † $p < .10$  (two-tailed tests).

Figure S3: Effect of Parent-child relationship through Romantic Partner Hostility Alone

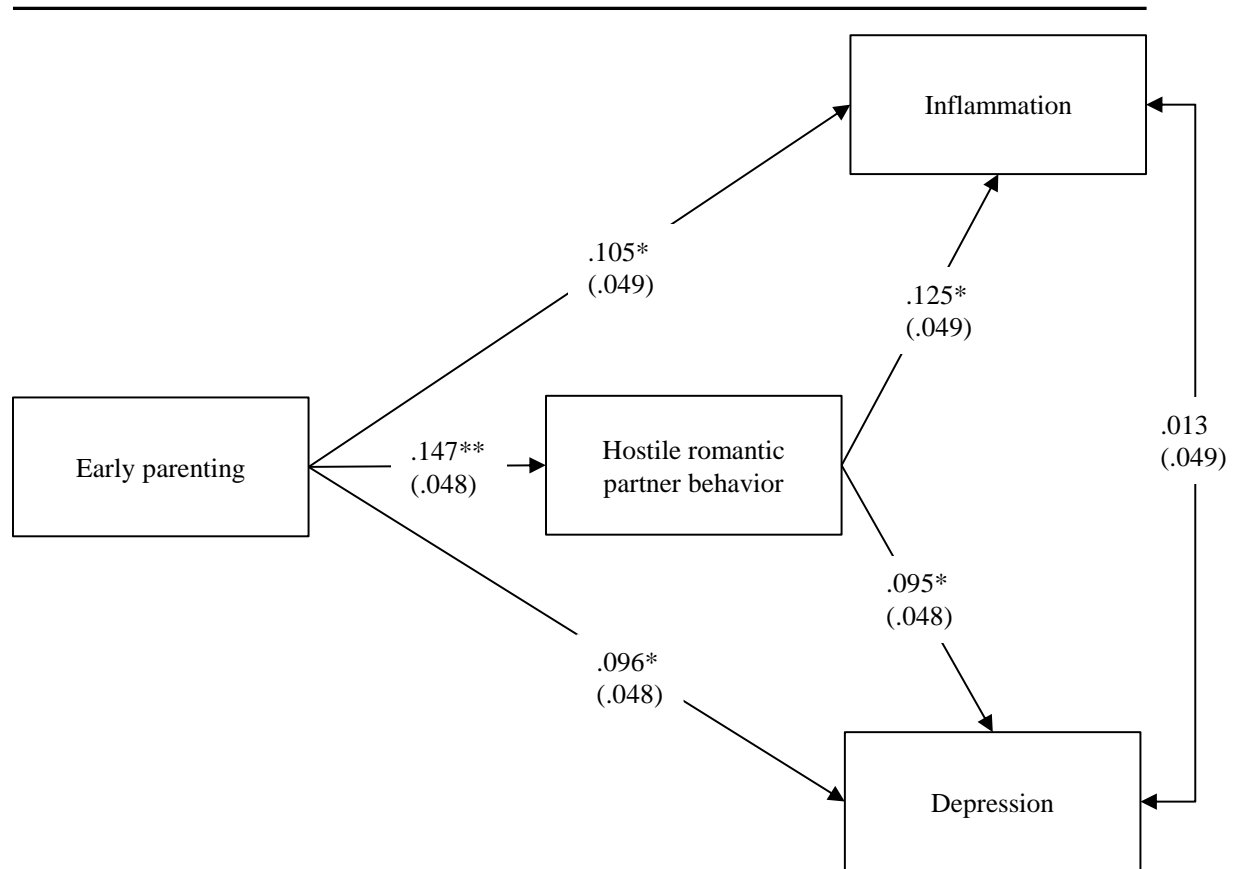

Chi-square = .000,  $df = 0$ ,  $p = .000$ ; CFI = 1.000. Values are standardized parameter estimates and standard errors are in parentheses. Gender, insurance, diet, exercise, binge drinking, cigarette use, high school, and married or cohabited are controlled in these analyses.  $N = 413$ .

Using bootstrap methods with 1,000 replications, the test of the indirect effect of parent-child relationship on INF through hostile romantic partner relationship is significant [indirect effect = .018, 95% CI (.003, .062), 14.634% of the total variance],  $p < .05$ ].

Using bootstrap methods with 1,000 replications, the test of the indirect effect of parent-child relationship on depression through hostile romantic partner relationship is not significant [indirect effect = .014, 95% CI (.000, .041)].

\*\* $p \leq .01$ ; \* $p \leq .05$ ; † $p < .10$  (two-tailed tests).
